# Supplementary material for: Changes in Intra-to-Extra-Cellular Water Ratio and Bioelectrical Parameters from Day-Before to Day-Of Competition in Bodybuilders: A Pilot Study
Source: MDPI journal article supplement (doi:10.3390/sports10020023), 2022-02-14
Supplement: s1 [file s1]

## Sheet: Plan1
abc	n	cat	exp	age	weight_1	weight_2	weight_mean	stature	bmi	r_1	r_2	xc_1	xc_2	pha_1	pha_2	tbw_1	tbw_2	icw_1	icw_2	ecw_1	ecw_2	i/e_r_1	i/e_r_2	i/t_r_1	i/t_r_2	xc/h_1	xc/h_2	r/h_1	r/h_2	biceps_1	biceps_2	waist_1	waist_2	thigh_1	thigh_2
M'o.	1	Men's physique	15	29	85.1	84	84.55	175	27.6082	418	434	77	86	10.4375	11.2083	52.4223	51.4721	32.6876	33.9068	19.7347	17.5653	1.65635	1.93033	0.623544	0.658741	44	49.1429	238.857	248	38	38.5	82	80.5	56.5	57.5
Ca.	2	Men's physique	8	31	73	73.5	73.25	167	26.2648	427	383	74	67	9.83183	9.92262	46.2132	47.8689	28.5777	31.5412	17.6355	16.3277	1.62046	1.93176	0.618388	0.658908	44.3114	40.1198	255.689	229.341	37	37	74	74	55	56
A. C.	3	BB <90kg	3	28	88.4	90.2	89.3	177	28.5039	380	402	64	72	9.5601	10.1543	55.4827	55.2959	34.2734	36.392	21.2094	18.9039	1.61596	1.9251	0.61773	0.658132	36.1582	40.678	214.689	227.119
Cr.	4	BB <100kg	2	30	94.5	93.7	94.1	177	30.0361	355	369	59	66	9.43615	10.1408	58.9634	58.0025	36.4111	38.1101	22.5523	19.8924	1.61452	1.91581	0.61752	0.657043	33.3333	37.2881	200.565	208.475
Ja.	5	BB <75kg	6	28	74	73.4	73.7	165	27.0707	416	436	67	69	9.14936	8.99287	46.6237	45.8073	28.6772	30.064	17.9465	15.7433	1.59793	1.90964	0.615077	0.656314	40.6061	41.8182	252.121	264.242	37	37	80	78	60	59
G.	6	Júnior >75kg	5	22	86	86.7	86.35	173	28.8516	344	387	57	66	9.4083	9.67826	55.4476	53.832	34.079	35.3843	21.3686	18.4477	1.59482	1.91808	0.614616	0.657309	32.948	38.1503	198.844	223.699
Ju.	7	BB <80kg	10	35	78.2	76.5	77.35	163	29.1129	334	376	56	65	9.51795	9.80792	50.9908	48.6036	31.3266	31.9262	19.6642	16.6774	1.59308	1.91434	0.614358	0.656869	34.3558	39.8773	204.908	230.675	35.5	37	81	80	58.5	58
M'lo.	8	Men's physique	2	30	67	67.4	67.2	161	25.9249	423	416	69	69	9.26452	9.41765	43.1164	43.4715	26.4721	28.5833	16.6443	14.8882	1.59045	1.91986	0.613967	0.657518	42.8571	42.8571	262.733	258.385	33.5	33.5	78	77.5	56	54
H.	9	Men's physique	7	28	84.7	82.7	83.7	181	25.5487	421	462	63	74	8.5108	9.09995	53.1558	51.0392	32.4879	33.5435	20.6679	17.4957	1.5719	1.91724	0.611182	0.65721	34.8066	40.884	232.597	255.249	35	36	80	80	59.5	57
P.	10	BB <80kg	2	34	80	78.6	79.3	171	27.1195	393	412	58	64	8.39526	8.82974	50.6809	49.4728	30.8927	32.4761	19.7882	16.9967	1.56117	1.91072	0.609553	0.656443	33.9181	37.4269	229.825	240.936	35.5	37	83.5	83	53	54
A. M.	11	Men's physique	1	22	78.3	75.9	77.1	182	23.2762	395	463	59	72	8.4953	8.83913	51.8699	48.5442	31.434	31.9482	20.4358	16.596	1.53818	1.92505	0.606017	0.658126	32.4176	39.5604	217.033	254.396	37.5	38	76	76	54	54
